# Supplementary material
Source: publisher figshare collection journal article supplement (https://gsajournals.figshare.com/ndownloader/files/15167216)
Supplement: Supplementary file 1 [file 15167216]

## Sheet: Genotyping primers
Primer	Sequence	Amplicon size (bp)
Primer-m-F	GGGCAAGCAGGAGCTGGTAAGAGAT	Wild type 3973 bp, KO 525 bp
Primer-m-R	TGGGCCACCACAACCTTCAAAGAT
Primer-p-F	CCGTGCTTCCTGGGGTTATCTGAG	Wild type 1818 bp, KO 841 bp
Primer-p-R	GCGGAGGGTGGCTGTTCTGTTAG

## Sheet: crRNAs
Name	Sequence	Target gene
sgRNA-m-5’	CATAACCGGACGTGAGATGG	Mmd
sgRNA-m-3’	AGTTACACTAGCTATCCCCA	Mmd
sgRNA-p-5’	GGTTGTCTAACTGAGCCCCG	Paqr8
sgRNA-p-3’	CAGACAGGGGACCGTGGCGC	Paqr8

## Sheet: Offtargets_sgRNA-m-5’
	guideId	guideSeq	offtargetSeq	mismatchPos	mismatchCount	mitOfftargetScore	cfdOfftargetScore	chrom	start	end	strand	locusDesc
1	32rev	CATAACCGGACGTGAGATGGGGG	CATAAAAGGACATGAGAAGGGGG	.....**....*.....*..	4	0.0598968	0.433333	chr4	99662426	99662448	-	intergenic:Foxd3/Gm23366-Gm12682
2	32rev	CATAACCGGACGTGAGATGGGGG	CATGACCGGTAGTAAGATGGAGG	...*.....**..*......	4	0.108967	0.310202	chr4	126549163	126549185	-	intergenic:Ago4-Clspn
3	32rev	CATAACCGGACGTGAGATGGGGG	CATAGCTGGACGTGGGATGTGGG	....*.*.......*....*	4	0.120855	0.266175	chr11	90647911	90647933	+	intron:Tom1l1
4	32rev	CATAACCGGACGTGAGATGGGGG	CATACCAGGACATGAGATGTTGG	....*.*....*.......*	4	0.221868	0.245	chr7	29142884	29142906	+	intron:Rasgrp4
5	32rev	CATAACCGGACGTGAGATGGGGG	CCTAACTGGACCTGGGATGGCGG	.*....*....*..*.....	4	0.135371	0.219682	chr9	62477105	62477127	+	intron:Coro2b
6	32rev	CATAACCGGACGTGAGATGGGGG	AAGAACCAGACGTGAGAGGGTGG	*.*....*.........*..	4	0.305989	0.166667	chr13	48286120	48286142	+	intergenic:A330048O09Rik-Zfp169
7	32rev	CATAACCGGACGTGAGATGGGGG	CATGAGTTGACGTGAGATGGTGG	...*.***............	4	0.539223	0.158691	chr18	61857283	61857305	+	intron:Ablim3
8	32rev	CATAACCGGACGTGAGATGGGGG	CATAACAGGTGATGAGATGGGGG	......*..***........	4	0.224146	0.154412	chr4	128217508	128217530	+	intergenic:Csmd2-Hmgb4
9	32rev	CATAACCGGACGTGAGATGGGGG	CAAAACCAGATGTGGGATGGAGG	..*....*..*...*.....	4	0.220451	0.142857	chr9	21251674	21251696	+	intergenic:S1pr5-Atg4d
10	32rev	CATAACCGGACGTGAGATGGGGG	CTGAGCCGCACGTGAGATGGGGG	.**.*...*...........	4	0.822304	0.140979	chr6	145855856	145855878	-	intergenic:Rassf8-Bhlhe41
11	32rev	CATAACCGGACGTGAGATGGGGG	CACAACCAGCCGTGAGATGAGGG	..*....*.*.........*	4	0.599577	0.133929	chr16	77254310	77254332	-	intron:2810055G20Rik
12	32rev	CATAACCGGACGTGAGATGGGGG	CACAATGGGACGTGAGATTGGGG	..*..**...........*.	4	0.203206	0.12485	chr5	118156925	118156947	+	intergenic:Fbxw8-Hrk
13	32rev	CATAACCGGACGTGAGATGGGGG	GATAACCGGAAGTTAGATTGGGG	*.........*..*....*.	4	0.0435677	0.121739	chr3	131135235	131135257	+	intron:Lef1
14	32rev	CATAACCGGACGTGAGATGGGGG	GATAACCGGTCGTCAGAGGGAGG	*........*...*...*..	4	0.0425867	0.11509	chr15	25812328	25812350	+	exon:Myo10
15	32rev	CATAACCGGACGTGAGATGGGGG	CATAACAGGAGGCAAGATGGAGG	......*...*.**......	4	0.0298349	0.11102	chr10	110772905	110772927	+	intron:E2f7
16	32rev	CATAACCGGACGTGAGATGGGGG	TATAACCCCACGTGAGAGGGAGG	*......**........*..	4	0.189614	0.110454	chr2	132043196	132043218	-	intergenic:Rassf2-Slc23a2
17	32rev	CATAACCGGACGTGAGATGGGGG	CATAAACCTCCGTGAGATGGTGG	.....*.***..........	4	0.444271	0.101587	chr5	44542050	44542072	-	intron:Ldb2
18	32rev	CATAACCGGACGTGAGATGGGGG	CATAAATGGACTTGAGAGGGAGG	.....**....*.....*..	4	0.0598968	0.0967262	chrX	6358081	6358103	-	intergenic:Bmp15-Shroom4
19	32rev	CATAACCGGACGTGAGATGGGGG	CATGAGCAGATGTGAGATGGTGG	...*.*.*..*.........	4	0.458314	0.0961538	chr15	18519090	18519112	-	intergenic:4921515E04Rik-C030047K22Rik
20	32rev	CATAACCGGACGTGAGATGGGGG	CATACCCGGCCCTGAAATGGGGG	....*....*.*...*....	4	0.111509	0.0882353	chr9	120423036	120423058	+	intron:Myrip
21	32rev	CATAACCGGACGTGAGATGGGGG	CATCACAGGACATGAGAGGGTGG	...*..*....*.....*..	4	0.099003	0.0823529	chr16	95058162	95058184	+	intron:Gm7976
22	32rev	CATAACCGGACGTGAGATGGGGG	CATGCCCGGAGGTAAGATGGGGG	...**.....*..*......	4	0.118314	0.0585938	chr13	13490157	13490179	+	exon:Nid1
23	32rev	CATAACCGGACGTGAGATGGGGG	CAAAACCGAACGTGAGGGGGAGG	..*.....*.......**..	4	0.0719792	0.0270108	chr6	5005998	5006020	+	intergenic:Gm26556-Ppp1r9a
24	32rev	CATAACCGGACGTGAGATGGGGG	CATAAGCGGACGCCAGTTGGTGG	.....*......**..*...	4	0.0192163	0.0225564	chr3	153693782	153693804	+	intergenic:Gm22136-Gm22206
25	32rev	CATAACCGGACGTGAGATGGGGG	CACAACCGGAGATGTGATGGCGG	..*.......**..*.....	4	0.108462	0.02	chr3	142694590	142694612	-	intergenic:Gbp2-Ccbl2
26	32rev	CATAACCGGACGTGAGATGGGGG	CATATCTGGAGGTGAGGTGGAGG	....*.*...*.....*...	4	0.219372	0.0130348	chr1	24927467	24927489	+	intergenic:Lmbrd1-Bai3
27	32rev	CATAACCGGACGTGAGATGGGGG	CAGAACCCGACGTGTCATGGTGG	..*....*......**....	4	0.0683198	0	chr3	96434415	96434437	+	exon:BC107364
28	32rev	CATAACCGGACGTGAGATGGGGG	CATGACCCCACGTGACATGGTGG	...*...**......*....	4	0.157971	0	chr17	49662738	49662760	-	intron:Kif6
29	32rev	CATAACCGGACGTGAGATGGGGG	CATAACAGGAAGTGACATGATGG	......*...*....*...*	4	0.0408681	0	chr13	78694447	78694469	+	intergenic:Gm6317-Gm25383
30	32rev	CATAACCGGACGTGAGATGGGGG	CAGGACTGGACGTGAGATGGAGG	..**..*.............	3	1.63414	0.253906	chr1	52659499	52659521	-	intron:Mfsd6
31	32rev	CATAACCGGACGTGAGATGGGGG	CGTAACTGGAGGTGAGATGGCAG	.*....*...*.........	3	0.202595	0.0421296	chr8	80496636	80496658	+	intron:Gypa

## Sheet: Offtargets_sgRNA-m-3’
	guideId	guideSeq	offtargetSeq	mismatchPos	mismatchCount	mitOfftargetScore	cfdOfftargetScore	chrom	start	end	strand	locusDesc
1	155forw	AGTTACACTAGCTATCCCCAAGG	AGTTAAACTAGCCAAACCCATGG	.....*......*.**....	4	0.0154413	0.424416	chrX	60517659	60517681	-	intron:Gm7073
2	155forw	AGTTACACTAGCTATCCCCAAGG	GGTTACACAAAGTATCCCCAGGG	*.......*.**........	4	0.238701	0.412698	chr3	64347797	64347819	-	intron:Vmn2r-ps5
3	155forw	AGTTACACTAGCTATCCCCAAGG	AGTGACGTTAACTATCCCCATGG	...*..**..*.........	4	0.517402	0.386029	chr5	148185718	148185740	+	intergenic:Gm10167-Mtus2
4	155forw	AGTTACACTAGCTATCCCCAAGG	ATTTGCACCAGCCATCCCCAGGG	.*..*...*...*.......	4	0.338304	0.333898	chr15	87095160	87095182	-	intergenic:Gm23416-n-R5s42
5	155forw	AGTTACACTAGCTATCCCCAAGG	TGTTACGTTAGCTTTCCCCAGGG	*.....**.....*......	4	0.152973	0.329412	chr4	133656305	133656327	+	intergenic:Gm22662-Pigv
6	155forw	AGTTACACTAGCTATCCCCAAGG	AGTCACACAAACTATCCACATGG	...*....*.*......*..	4	0.0999072	0.323529	chr4	98765901	98765923	+	intron:Kank4
7	155forw	AGTTACACTAGCTATCCCCAAGG	AGATAAACAAGCTATCTCCAAGG	..*..*..*.......*...	4	0.210931	0.287415	chr11	80641503	80641525	-	intron:Myo1d
8	155forw	AGTTACACTAGCTATCCCCAAGG	AGTCACACAAACTATCACCATGG	...*....*.*.....*...	4	0.196246	0.280392	chr13	10293837	10293859	+	intergenic:Chrm3-Gm26861
9	155forw	AGTTACACTAGCTATCCCCAAGG	AGTTACACTTGATATACCAAGGG	.........*.*...*..*.	4	0.0351252	0.270108	chr12	98783887	98783909	-	intron:Zc3h14
10	155forw	AGTTACACTAGCTATCCCCAAGG	ATTTATAGGAGCTATCCCCAAGG	.*...*.**...........	4	0.504558	0.235158	chr10	13646001	13646023	+	intergenic:Adat2-Aig1
11	155forw	AGTTACACTAGCTATCCCCAAGG	AGTTGGAGAAGCTATCCCCAGGG	....**.**...........	4	0.482379	0.214898	chr13	66968793	66968815	-	intron:Ptdss1
12	155forw	AGTTACACTAGCTATCCCCAAGG	ATTTACACTAACAATCACCACGG	.*........*.*...*...	4	0.130929	0.205594	chr9	48335111	48335133	+	intron:Nxpe2
13	155forw	AGTTACACTAGCTATCCCCAAGG	AGATAAAGTAGCTATCACCAAGG	..*..*.*........*...	4	0.345223	0.19898	chr9	111221281	111221303	-	intron:Lrrfip2
14	155forw	AGTTACACTAGCTATCCCCAAGG	ATTTGCAATAGCTATCCTCAAGG	.*..*..*.........*..	4	0.310333	0.191455	chr2	26935302	26935324	-	exon:Gm711
15	155forw	AGTTACACTAGCTATCCCCAAGG	AGTTAAAATAGCTAACCACAAGG	.....*.*......*..*..	4	0.0477697	0.188158	chr3	141119347	141119369	-	intergenic:Gm6214-Pdha2
16	155forw	AGTTACACTAGCTATCCCCAAGG	AGTTGCACTAGCTGTACACAGGG	....*........*.*.*..	4	0.00755053	0.180923	chr6	112690504	112690526	+	intron:Rad18
17	155forw	AGTTACACTAGCTATCCCCAAGG	AGCTACACTAACCTTCCCCAGGG	..*.......*.**......	4	0.0451464	0.180451	chr6	137506501	137506523	+	intron:Eps8
18	155forw	AGTTACACTAGCTATCCCCAAGG	AGTCACACTCACCATCCCCAGGG	...*.....**.*.......	4	0.283021	0.170279	chr1	88952092	88952114	-	intergenic:2410088K16Rik-Sh3bp4
19	155forw	AGTTACACTAGCTATCCCCAAGG	AGTAACACTAACCATCCCAAAGG	...*......*.*.....*.	4	0.107124	0.161117	chr17	32504399	32504421	-	intergenic:Cyp4f39-Cyp4f17
20	155forw	AGTTACACTAGCTATCCCCAAGG	GGTTTTCCTAGCTATCCCCATGG	*...***.............	4	0.564015	0.147727	chr2	114969872	114969894	+	intron:Gm13974
21	155forw	AGTTACACTAGCTATCCCCAAGG	AGATACAGTGGCTAACCCCAAGG	..*....*.*....*.....	4	0.365829	0.147691	chr7	94013890	94013912	-	intergenic:Gm15501-Gm5899
22	155forw	AGTTACACTAGCTATCCCCAAGG	AGTGAGACTAGATATCCTCAAGG	...*.*.....*.....*..	4	0.0876967	0.143495	chr9	51104517	51104539	-	intergenic:Mir34b-Btg4
23	155forw	AGTTACACTAGCTATCCCCAAGG	AGTTTCACATGCTATCCCTATGG	....*...**........*.	4	0.266451	0.13751	chr10	21906703	21906725	+	intron:Sgk1
24	155forw	AGTTACACTAGCTATCCCCAAGG	AGGTATTATAGCTATCCCCATGG	..*..***............	4	0.531674	0.132031	chrX	150645643	150645665	+	intron:Tro
25	155forw	AGTTACACTAGCTATCCCCAAGG	AGTTGCAAGAGGTATCCCCAGGG	....*..**..*........	4	0.410318	0.128762	chr14	51611489	51611511	-	intergenic:Gm17078-Gm4181
26	155forw	AGTTACACTAGCTATCCCCAAGG	AGTGTCACTAACTATCCACAAGG	...**.....*......*..	4	0.163514	0.122378	chr11	45402545	45402567	-	intergenic:Gm12161-Gm12162
27	155forw	AGTTACACTAGCTATCCCCAAGG	AGTTACAGTAGCTAACCCAGGGG	.......*......*...**	4	0.0529161	0.121975	chr7	63834618	63834640	-	intergenic:Otud7a-Klf13
28	155forw	AGTTACACTAGCTATCCCCAAGG	AGTTACACAATCTATCCCAGAGG	........*.*.......**	4	0.0637289	0.117047	chr17	7719076	7719098	+	intergenic:Gm25872-Fndc1
29	155forw	AGTTACACTAGCTATCCCCAAGG	TGTTACACTAGCAACCCCCTAGG	*...........*.*....*	4	0.0723364	0.113287	chr10	84087967	84087989	-	intergenic:1500009L16Rik-Nuak1
30	155forw	AGTTACACTAGCTATCCCCAAGG	AGTTAGATTAGCTTTCACCAGGG	.....*.*.....*..*...	4	0.0496544	0.108889	chr3	54704748	54704770	-	intron:Supt20
31	155forw	AGTTACACTAGCTATCCCCAAGG	AATTCCACTGGCTATCCCTAAGG	.*..*....*........*.	4	0.459349	0.108481	chr2	144065957	144065979	-	intron:Gm12357
32	155forw	AGTTACACTAGCTATCCCCAAGG	AGTAACATTAGGTAACCCCAGGG	...*...*...*..*.....	4	0.188649	0.107212	chr17	4619977	4619999	-	intergenic:Nox3-Gm23186
33	155forw	AGTTACACTAGCTATCCCCAAGG	ACTTACACGAGCTTTCCCTATGG	.*......*....*....*.	4	0.0454057	0.105495	chr12	75511367	75511389	+	intron:Ppp2r5e
34	155forw	AGTTACACTAGCTATCCCCAAGG	ATTTACACTATCAATCCCCTGGG	.*........*.*......*	4	0.149801	0.101668	chr14	9983079	9983101	-	intergenic:Gm3833-Fhit
35	155forw	AGTTACACTAGCTATCCCCAAGG	AGTTTCACCAGCTATCATCAGGG	....*...*.......**..	4	0.069305	0.100699	chr4	9509207	9509229	-	intron:Asph
36	155forw	AGTTACACTAGCTATCCCCAAGG	AGTCAAACTAGCTTTTCCCATGG	...*.*.......*.*....	4	0.0233065	0.0985994	chr11	22675352	22675374	-	intergenic:Gm12053-Gm12054
37	155forw	AGTTACACTAGCTATCCCCAAGG	AGGTGGACTAGCTTTCCCCAAGG	..*.**.......*......	4	0.127167	0.096	chr6	122739703	122739725	+	exon:Slc2a3
38	155forw	AGTTACACTAGCTATCCCCAAGG	ATTTACACTAGCTATCTACTTGG	.*..............**.*	4	0.0526294	0.0959441	chr5	101631002	101631024	+	intergenic:Gm20484-Nkx6-1
39	155forw	AGTTACACTAGCTATCCCCAAGG	AATTTCACTAGGAATCCCCAAGG	.*..*......**.......	4	0.272415	0.0946746	chr4	68279605	68279627	+	intergenic:Gm23738-Tcp1-ps1
40	155forw	AGTTACACTAGCTATCCCCAAGG	AGGTACACTAGGCATCTCCATGG	..*........**...*...	4	0.108648	0.0818713	chr3	65249522	65249544	+	intron:Kcnab1
41	155forw	AGTTACACTAGCTATCCCCAAGG	AGTTACAGTGGCTGTCTCCAGGG	.......*.*...*..*...	4	0.0755896	0.0777778	chr15	98669475	98669497	-	exon:Rnd1
42	155forw	AGTTACACTAGCTATCCCCAAGG	AGTTATACTAGCTAATTCCAAGG	.....*........***...	4	0.0153615	0.077193	chrX	112399685	112399707	-	intron:Satl1
43	155forw	AGTTACACTAGCTATCCCCAAGG	ATTTACACTGGCTATCTCTATGG	.*.......*......*.*.	4	0.176849	0.0761461	chr18	82275927	82275949	-	intergenic:Mir5127-Gm17383
44	155forw	AGTTACACTAGCTATCCCCAAGG	AGCTACTCTGGCAATCCCCAAGG	..*...*..*..*.......	4	0.343419	0.0721154	chr6	53829435	53829457	+	intergenic:Tril/Gm16499-Gm22910
45	155forw	AGTTACACTAGCTATCCCCAAGG	AGTTACAATAGTTATCTCAAAGG	.......*...*....*.*.	4	0.0853674	0.07	chr2	140821735	140821757	-	intron:Macrod2
46	155forw	AGTTACACTAGCTATCCCCAAGG	AGGAACACTAGTTTTCCCCAAGG	..**.......*.*......	4	0.103415	0.0683761	chr11	64683607	64683629	+	intergenic:Gm24275-Gm12291
47	155forw	AGTTACACTAGCTATCCCCAAGG	AGATAAACTAGCTATGCTCATGG	..*..*.........*.*..	4	0.0318412	0.0655977	chr17	79529153	79529175	+	intergenic:Gm17315-Rmdn2
48	155forw	AGTTACACTAGCTATCCCCAAGG	AGTTACTGTAGTTATCCCAAAGG	......**...*......*.	4	0.159112	0.0649038	chr12	75033759	75033781	-	intron:Kcnh5
49	155forw	AGTTACACTAGCTATCCCCAAGG	AGTTACAGTAGCCACCTCCATGG	.......*....*.*.*...	4	0.0571297	0.0645933	chr19	20227193	20227215	-	intergenic:Gm22684-Anxa1
50	155forw	AGTTACACTAGCTATCCCCAAGG	TGTTACAGTAGCTCTCTCCATGG	*......*.....*..*...	4	0.0908279	0.0642857	chr10	116299366	116299388	+	intergenic:Ptprr-Ptprb
51	155forw	AGTTACACTAGCTATCCCCAAGG	AGTTTCATTAGCTATCACAATGG	....*..*........*.*.	4	0.182296	0.0636364	chr14	19841382	19841404	-	intergenic:2700060E02Rik-Gng2
52	155forw	AGTTACACTAGCTATCCCCAAGG	AGTGGCACTAGTGATCCCCATGG	...**......**.......	4	0.272415	0.0632107	chr11	80661939	80661961	+	intron:Myo1d
53	155forw	AGTTACACTAGCTATCCCCAAGG	AGTTACCCTAGCTGTCTCCTAGG	......*......*..*..*	4	0.024559	0.0571667	chr6	6224792	6224814	+	intergenic:Slc25a13-Gm20619
54	155forw	AGTTACACTAGCTATCCCCAAGG	AGTGACAGTATCTATTCCCAGGG	...*...*..*....*....	4	0.143492	0.0475486	chr7	102386805	102386827	-	intron:Stim1
55	155forw	AGTTACACTAGCTATCCCCAAGG	CGTTTCAATTGCTATCCCCAAAG	*...*..*.*..........	4	0.263539	0.0463458	chr4	96946554	96946576	-	intergenic:U7-Gm10192
56	155forw	AGTTACACTAGCTATCCCCAAGG	AGATCCACTAGCTGCCCCCAGGG	..*.*........**.....	4	0.059184	0.0454545	chr4	154860990	154861012	-	intron:Ttc34
57	155forw	AGTTACACTAGCTATCCCCAAGG	AGGTACCCTAGCTGTCCCAATGG	..*...*......*....*.	4	0.0500457	0.04375	chr19	45015584	45015606	+	intron:Lzts2
58	155forw	AGTTACACTAGCTATCCCCAAGG	AGTTACTATAGCCATGCCCATGG	......**....*..*....	4	0.0650453	0.0345395	chr1	142482178	142482200	+	intergenic:Gm22016-Cdc73
59	155forw	AGTTACACTAGCTATCCCCAAGG	AGTCACACTTTCTATGCCCAAGG	...*.....**....*....	4	0.132156	0.0337831	chr12	113085924	113085946	+	intron:Tex22
60	155forw	AGTTACACTAGCTATCCCCAAGG	AGTGACAATAGCTATGCACAGGG	...*...*.......*.*..	4	0.0506747	0.0336538	chr11	8223981	8224003	-	intergenic:Gm11988-Gm11989
61	155forw	AGTTACACTAGCTATCCCCAAGG	AGTTACTGTAGTTCTCCCCATGG	......**...*.*......	4	0.0683418	0.0324519	chrX	73554375	73554397	+	intron:Atp2b3
62	155forw	AGTTACACTAGCTATCCCCAAGG	AGATACACTAGCTGTGCCCTGGG	..*..........*.*...*	4	0.016684	0.0307692	chr3	99246964	99246986	+	intron:Tbx15
63	155forw	AGTTACACTAGCTATCCCCAAGG	TATGACACTAGCTAGCCCCAAGG	**.*..........*.....	4	0.402848	0.0264423	chr1	105310940	105310962	+	intron:Rnf152
64	155forw	AGTTACACTAGCTATCCCCAAGG	AGTTACCCTAGCCATGCCAATGG	......*.....*..*..*.	4	0.0215267	0.0227733	chr2	113454347	113454369	-	intron:Fmn1
65	155forw	AGTTACACTAGCTATCCCCAAGG	AGTAACACTAGCTATCAGTAAGG	...*............***.	4	0.0376357	0.0136752	chr1	115963207	115963229	-	intron:Cntnap5a
66	155forw	AGTTACACTAGCTATCCCCAAGG	ATTTACAGTAGCTCTGCCCATGG	.*.....*.....*.*....	4	0.0385231	0.0134865	chr10	60573297	60573319	+	intron:Cdh23
67	155forw	AGTTACACTAGCTATCCCCAAGG	AGTTCCACTAGCGCTCTCCATGG	....*.......**..*...	4	0.0333706	0.0130435	chr18	86180534	86180556	+	intergenic:Fbxo15-Gm25453
68	155forw	AGTTACACTAGCTATCCCCAAGG	AGGTAAACTACCTAGCCCCATGG	..*..*....*...*.....	4	0.133373	0.00994898	chr7	75860509	75860531	-	intron:Klhl25
69	155forw	AGTTACACTAGCTATCCCCAAGG	TGTTACTCTATCTAGCCCCAGGG	*.....*...*...*.....	4	0.152706	0.00841346	chr4	134344781	134344803	+	intron:Slc30a2
70	155forw	AGTTACACTAGCTATCCCCAAGG	AGCTACACTAGCTGGCCCAAGGG	..*..........**...*.	4	0.0196373	0.00428571	chr7	123914936	123914958	+	intergenic:Zkscan2-Gm23788
71	155forw	AGTTACACTAGCTATCCCCAAGG	AGTTACAGTAGCTGTCGGCAGGG	.......*.....*..**..	4	0.0160864	0.00235294	chr1	13575660	13575682	+	intron:Tram1
72	155forw	AGTTACACTAGCTATCCCCAAGG	ACTGACACCAGCTATCCCCAGGG	.*.*....*...........	3	1.55408	0.399408	chr13	112006170	112006192	-	intron:Gm15323
73	155forw	AGTTACACTAGCTATCCCCAAGG	AATGAGACTAGCTATCCCCAAGG	.*.*.*..............	3	1.46807	0.264423	chr7	33745472	33745494	+	intergenic:Scgb1b24-Gm12782
74	155forw	AGTTACACTAGCTATCCCCAAGG	AGAGACACTAGCTGTCCCCATGG	..**.........*......	3	0.413536	0.208333	chr11	119167458	119167480	+	intergenic:Tbc1d16-Gm11753
75	155forw	AGTTACACTAGCTATCCCCAAGG	AGTTACTATAGTTATCCCCATGG	......**...*........	3	0.815413	0.153125	chr14	27199769	27199791	-	intergenic:Il17rd-Arhgef3
76	155forw	AGTTACACTAGCTATCCCCAAGG	AGTTAGAGTAGCTATCACCAAGG	.....*.*........*...	3	0.655641	0.15	chr13	36879208	36879230	-	intron:F13a1
77	155forw	AGTTACACTAGCTATCCCCAAGG	TGTCACACTAGCTATGCCCATGG	*..*...........*....	3	0.541957	0.0995475	chr6	126778244	126778266	+	intergenic:Kcna6/Gm26673-Ndufa9
78	155forw	AGTTACACTAGCTATCCCCAAGG	GGTTACACTAGCTATGCCAAGGG	*..............*..*.	3	0.193864	0.0659341	chr11	89677361	89677383	-	intergenic:Ankfn1-Pctp
79	155forw	AGTTACACTAGCTATCCCCAAGG	AGTTTCAAAAGCTATCCCCAAAG	....*..**...........	3	0.296526	0.0569024	chrX	130347738	130347760	+	intergenic:Diap2-Gm14984
80	155forw	AGTTACACTAGCTATCCCCAAGG	AGTTACACGAGCCAGCCCCATGG	........*...*.*.....	3	0.161183	0.0244361	chr17	34612953	34612975	-	exon:Agpat1/Egfl8
81	155forw	AGTTACACTAGCTATCCCCAAGG	AGTTACATTTCCTATCCCCATGA	.......*.**.........	3	0.237166	0.0229779	chr19	56120264	56120286	-	intergenic:Tcf7l2-Gm22271
82	155forw	AGTTACACTAGCTATCCCCAAGG	AGTGTGACTAGCTATCCCCAGGA	...***..............	3	0.280708	0.00789141	chr11	5025120	5025142	-	intron:Ap1b1
83	155forw	AGTTACACTAGCTATCCCCAAGG	AGTCACACTAGCTATGGCCAGGG	...*...........**...	3	0.196898	0.00585574	chr12	35753589	35753611	+	intergenic:Ahr-Agr3

## Sheet: Offtargets_sgRNA-p-5’
	guideId	guideSeq	offtargetSeq	mismatchPos	mismatchCount	mitOfftargetScore	cfdOfftargetScore	chrom	start	end	strand	locusDesc
1	128forw	GGTTGTCTAACTGAGCCCCGAGG	GGAGGCCTAACCGAGCCCCGGGG	..**.*.....*........	4	0.419907	0.384484	chr2	164786350	164786372	-	intron:Snx21
2	128forw	GGTTGTCTAACTGAGCCCCGAGG	GGATGTCTGACTGAGACCCTGGG	..*.....*......*...*	4	0.0684156	0.333333	chr8	107552835	107552857	+	intron:Wwp2
3	128forw	GGTTGTCTAACTGAGCCCCGAGG	GGTTGTATGACTGAGCCTCAAGG	......*.*........*.*	4	0.0512697	0.301339	chr17	64813024	64813046	+	intergenic:Man2a1/Gm17133-4930583I09Rik
4	128forw	GGTTGTCTAACTGAGCCCCGAGG	GGTTGTCCCACTGAGCCACACGG	.......**........*.*	4	0.0750654	0.288462	chr3	131170896	131170918	-	intron:Lef1
5	128forw	GGTTGTCTAACTGAGCCCCGAGG	GGTTCTCTCACTGAACCTCGGGG	....*...*.....*..*..	4	0.0482435	0.271652	chr18	12996146	12996168	-	intergenic:Impact-Hrh4
6	128forw	GGTTGTCTAACTGAGCCCCGAGG	GGTTGTCTTTCTGAGCCACATGG	........**.......*.*	4	0.0658034	0.267251	chr9	94257701	94257723	-	intergenic:Gm9621-Gm24200
7	128forw	GGTTGTCTAACTGAGCCCCGAGG	GGTTGCCTAGCTGTGCCCCAGGG	.....*...*...*.....*	4	0.0520408	0.252525	chr4	108459301	108459323	-	intergenic:Gm12738-Zcchc11
8	128forw	GGTTGTCTAACTGAGCCCCGAGG	GGTAGTTAAACAGAGCCCCGAGG	...*..**...*........	4	0.45867	0.247619	chrX	52375068	52375090	-	intron:Gpc3
9	128forw	GGTTGTCTAACTGAGCCCCGAGG	GGTGGTCAATCTGTGCCCCGTGG	...*...*.*...*......	4	0.196337	0.235294	chr1	22286457	22286479	+	exon:Rims1
10	128forw	GGTTGTCTAACTGAGCCCCGAGG	GTTTCTCTAACTGGGCCCCAGGG	.*..*........*.....*	4	0.10392	0.21875	chr2	11774526	11774548	+	intron:Fbxo18
11	128forw	GGTTGTCTAACTGAGCCCCGAGG	TGTTGCCTAACTGAGCTCAGGGG	*....*..........*.*.	4	0.122716	0.181818	chr5	75402155	75402177	+	intergenic:Gm22084-Gm24502
12	128forw	GGTTGTCTAACTGAGCCCCGAGG	GGATGGCTCACTGAGCCCCTGGG	..*..*..*..........*	4	0.240648	0.163265	chr13	3956910	3956932	+	intergenic:Ucn3-Gm22460
13	128forw	GGTTGTCTAACTGAGCCCCGAGG	GGTTGTCTGATAGAGCCCCAGGG	........*.**.......*	4	0.0995385	0.153846	chr1	30399358	30399380	-	intergenic:AC132241.1-Gm9898
14	128forw	GGTTGTCTAACTGAGCCCCGAGG	GGTTGTCTGGCTCAGCCCCATGG	........**..*......*	4	0.129928	0.146199	chr1	49925419	49925441	+	intergenic:C230029F24Rik-PCGEM1
15	128forw	GGTTGTCTAACTGAGCCCCGAGG	GGTGGTCTGAATGAGCACCGTGG	...*....*.*.....*...	4	0.196246	0.145833	chr6	28830124	28830146	+	exon:Lrrc4
16	128forw	GGTTGTCTAACTGAGCCCCGAGG	GGTGGTCTCTCTGAGCCCTGGGG	...*....**........*.	4	0.280662	0.145443	chr2	173287602	173287624	-	intergenic:Gm14454-Gm14642
17	128forw	GGTTGTCTAACTGAGCCCCGAGG	GGCTGTCCAACTGGGCCTCGAGG	..*....*.....*...*..	4	0.0455923	0.128571	chr17	28249375	28249397	+	intron:Ppard
18	128forw	GGTTGTCTAACTGAGCCCCGAGG	AGTTTTCTATCTGTGCCCCGAGG	*...*....*...*......	4	0.206278	0.127059	chr1	67535322	67535344	+	intergenic:Gm15668-Kif22-ps
19	128forw	GGTTGTCTAACTGAGCCCCGAGG	GGGTGTCTCACTGAACCCAGAGG	..*.....*.....*...*.	4	0.0805259	0.115246	chr8	115968544	115968566	-	intergenic:Maf/Gm15655-Dynlrb2
20	128forw	GGTTGTCTAACTGAGCCCCGAGG	GGATTTCTAGCTAAGCCCCGGGG	..*.*....*..*.......	4	0.502809	0.10989	chr8	110927262	110927284	+	intergenic:Gm26132-St3gal2
21	128forw	GGTTGTCTAACTGAGCCCCGAGG	TGTTCTCTAAGTGTGCCCCGGGG	*...*.....*..*......	4	0.124304	0.104762	chr2	33605612	33605634	+	intron:Lmx1b
22	128forw	GGTTGTCTAACTGAGCCCCGAGG	GGGTCTCTCACTGAGCCCTGAGG	..*.*...*.........*.	4	0.30047	0.103611	chrX	13516152	13516174	+	intergenic:Gm14506-Cask
23	128forw	GGTTGTCTAACTGAGCCCCGAGG	GGGTATCTAACTGAGCCACCAGG	..*.*............*.*	4	0.127597	0.1	chr2	166403214	166403236	-	intergenic:Gm14268-5031425F14Rik
24	128forw	GGTTGTCTAACTGAGCCCCGAGG	GGATGTCTTCCTGAGCCCCTTGG	..*.....**.........*	4	0.366342	0.1	chr10	111220833	111220855	+	intron:Osbpl8
25	128forw	GGTTGTCTAACTGAGCCCCGAGG	GGGTGTCTATCTGGGCCCTGTGG	..*......*...*....*.	4	0.0674848	0.0950226	chr3	85785045	85785067	-	intergenic:Fam160a1-Arfip1
26	128forw	GGTTGTCTAACTGAGCCCCGAGG	GGTGGTGTGACTGAGCCCTGTGG	...*..*.*.........*.	4	0.208135	0.0904977	chr7	34918257	34918279	+	intron:Pepd
27	128forw	GGTTGTCTAACTGAGCCCCGAGG	GCTCGTCTTCCTGAGCCCCGTGG	.*.*....**..........	4	0.768095	0.0895928	chr1	190444627	190444649	+	intergenic:Gm17566-Gm23153
28	128forw	GGTTGTCTAACTGAGCCCCGAGG	TGTGTTGTAACTGAGCCCCGAGG	*..**.*.............	4	0.932256	0.0882353	chr9	22782951	22782973	+	intergenic:U4-Bbs9
29	128forw	GGTTGTCTAACTGAGCCCCGAGG	GCTTGGCTAACTGAGCACTGTGG	.*...*..........*.*.	4	0.116171	0.0852071	chr3	63504706	63504728	+	intergenic:Gm24946-Plch1
30	128forw	GGTTGTCTAACTGAGCCCCGAGG	TTTTGTCTAACTGAGTCCAGGGG	**.............*..*.	4	0.090618	0.0839161	chr5	65474701	65474723	+	intron:Smim14
31	128forw	GGTTGTCTAACTGAGCCCCGAGG	GGTTATTTAACTGACCCCCCAGG	....*.*.......*....*	4	0.120855	0.0823052	chr13	29976085	29976107	+	intergenic:Gm11365-E2f3
32	128forw	GGTTGTCTAACTGAGCCCCGAGG	GGCTGGGTAACTGAGCCCCTTGG	..*..**............*	4	0.269006	0.0806723	chr7	45356469	45356491	-	intron:Ppfia3
33	128forw	GGTTGTCTAACTGAGCCCCGAGG	GGCTGTGTAACTGTGCCCCTTGG	..*...*......*.....*	4	0.066251	0.0752941	chr10	90616160	90616182	-	intron:Anks1b
34	128forw	GGTTGTCTAACTGAGCCCCGAGG	GGCTGTCTATCTCAGCCCAGAGG	..*......*..*.....*.	4	0.175279	0.0682378	chr1	164553016	164553038	+	intergenic:Gm26685-Dpt
35	128forw	GGTTGTCTAACTGAGCCCCGAGG	GGCTGTGTAACTGAGCCCTTGGG	..*...*...........**	4	0.140061	0.0651584	chr14	11056033	11056055	-	intron:Fhit
36	128forw	GGTTGTCTAACTGAGCCCCGAGG	GGGTCTCTTACTGACCCCCGGGG	..*.*...*.....*.....	4	0.242694	0.0642857	chr18	76410263	76410285	+	intergenic:Smad2-Skor2
37	128forw	GGTTGTCTAACTGAGCCCCGAGG	GTGTGTGTAACTGAGCCCAGAGG	.**...*...........*.	4	0.335877	0.0641711	chr19	26051676	26051698	+	intergenic:Gm8825-Gm25176
38	128forw	GGTTGTCTAACTGAGCCCCGAGG	GTGTGTCTAACTGGGCCCAGAGG	.**..........*....*.	4	0.0732734	0.0636364	chr4	98754987	98755009	-	exon:Kank4
39	128forw	GGTTGTCTAACTGAGCCCCGAGG	TGTGGTCAAACTGAGCCCGGAGG	*..*...*..........*.	4	0.526849	0.0625	chr13	34994068	34994090	+	exon:Eci2
40	128forw	GGTTGTCTAACTGAGCCCCGAGG	GGTTCTCTAACTGTGGCCCAGGG	....*........*.*...*	4	0.0169209	0.0604396	chr19	23894855	23894877	-	intron:Apba1
41	128forw	GGTTGTCTAACTGAGCCCCGAGG	GGGTCTCTAACTGAGGCCCAGGG	..*.*..........*...*	4	0.111973	0.0566621	chr1	127630060	127630082	-	intron:Tmem163
42	128forw	GGTTGTCTAACTGAGCCCCGAGG	GGGTTTCTCACTGAGCCTCGAGG	..*.*...*........*..	4	0.186959	0.055102	chr1	63631239	63631261	-	intron:Dytn
43	128forw	GGTTGTCTAACTGAGCCCCGAGG	GGTTTTCAAATTGAGCCCCTGGG	....*..*..*........*	4	0.366439	0.0516923	chr12	29091755	29091777	+	intergenic:Gm23342-Myt1l
44	128forw	GGTTGTCTAACTGAGCCCCGAGG	GGTTCTCTTACTGAGCCTGGAGG	....*...*........**.	4	0.0567041	0.0378827	chr4	141274369	141274391	+	intergenic:Gm13055-Gm13056
45	128forw	GGTTGTCTAACTGAGCCCCGAGG	GGTTATCTAACTGCCCCCCTGGG	....*........**....*	4	0.0263651	0.0354545	chr11	112813658	112813680	-	intergenic:Gm11681-4933434M16Rik
46	128forw	GGTTGTCTAACTGAGCCCCGAGG	GGATGTCTCACTGAGCCTGGTGG	..*.....*........**.	4	0.0588921	0.0327988	chr5	134512063	134512085	+	intron:Clip2
47	128forw	GGTTGTCTAACTGAGCCCCGAGG	TGTTGTCTTCCTGATCCCCGTGG	*.......**....*.....	4	0.226695	0.0285714	chr5	147861597	147861619	+	intron:Pomp
48	128forw	GGTTGTCTAACTGAGCCCCGAGG	GTTTTTCTAACTGAGGCCAGTGG	.*..*..........*..*.	4	0.085785	0.0125874	chr9	53972191	53972213	+	intron:Elmod1
49	128forw	GGTTGTCTAACTGAGCCCCGAGG	GGTTTTCTAACTGATGCCTGTGG	....*.........**..*.	4	0.0218263	0.00304311	chr1	41760663	41760685	-	intergenic:Gm5973-Gm9915
50	128forw	GGTTGTCTAACTGAGCCCCGAGG	GGTTGTCTAACTGCGGCAGGTGG	.............*.*.**.	4	0.00206478	0.00221893	chr1	158633976	158633998	-	intron:Astn1
51	128forw	GGTTGTCTAACTGAGCCCCGAGG	GGTTGTCCAAATGTGCCCCGAGG	.......*..*..*......	3	0.210335	0.4	chr17	73007829	73007851	-	intergenic:Gm23649-Lclat1
52	128forw	GGTTGTCTAACTGAGCCCCGAGG	GGATGTCTAACTGAGACCAGAGG	..*............*..*.	3	0.179014	0.306122	chr2	180342804	180342826	-	intergenic:Gm14318-B230312C02Rik

## Sheet: Offtargets_sgRNA-p-3’
	guideId	guideSeq	offtargetSeq	mismatchPos	mismatchCount	mitOfftargetScore	cfdOfftargetScore	chrom	start	end	strand	locusDesc
1	21rev	CAGACAGGGGACCGTGGCGCTGG	CAGACTAAGAACCGTGGCGCAGG	.....***.*..........	4	0.496624	0.666667	chr17	45152021	45152043	-	intergenic:Supt3-Gm24979
2	21rev	CAGACAGGGGACCGTGGCGCTGG	GAGACAGAGGAACGTGGCACCGG	*......*...*......*.	4	0.25921	0.465839	chr8	24531358	24531380	+	intergenic:1810011O10Rik/Gm26714-Ido2
3	21rev	CAGACAGGGGACCGTGGCGCTGG	CCAACAGTGGACCGTGACGCAGG	.**....*........*...	4	0.601049	0.34375	chr5	77282595	77282617	+	exon:Rest
4	21rev	CAGACAGGGGACCGTGGCGCTGG	CAGACAGGCAGCCGTAGCGCTGG	........***....*....	4	0.0733224	0.326667	chr10	71222440	71222462	+	intergenic:Bicc1-Tfam
5	21rev	CAGACAGGGGACCGTGGCGCTGG	CAGACAGACAACCGTGGTGCTGG	.......***.......*..	4	0.157802	0.323077	chr12	38421664	38421686	+	intron:Dgkb
6	21rev	CAGACAGGGGACCGTGGCGCTGG	GAAACAGGGGACTGAGGCGCAGG	*.*.........*.*.....	4	0.15372	0.277517	chr5	105290564	105290586	+	intron:Gbp6
7	21rev	CAGACAGGGGACCGTGGCGCTGG	CAGACAGAGGACAGTAGCTCAGG	.......*....*..*..*.	4	0.0299989	0.25641	chr15	71432668	71432690	+	intergenic:Gm23987-Fam135b
8	21rev	CAGACAGGGGACCGTGGCGCTGG	CAGACAGGGGGACATGGCACAGG	..........**.*....*.	4	0.0174932	0.248724	chr9	22514529	22514551	-	intron:Bbs9
9	21rev	CAGACAGGGGACCGTGGCGCTGG	CTGAAAGGGTACCGTGGCTCTGG	.*..*....*........*.	4	0.459349	0.225108	chr10	77716335	77716357	+	intergenic:Gm10142-Krtap12-1
10	21rev	CAGACAGGGGACCGTGGCGCTGG	CAAACAGGAGACTGTGGCTCTGG	..*.....*...*.....*.	4	0.116282	0.225	chr7	109904413	109904435	+	intron:Dennd5a
11	21rev	CAGACAGGGGACCGTGGCGCTGG	GGGACAGGGGCCCGTGGCACAGG	**........*.......*.	4	0.292401	0.208696	chr15	86025077	86025099	+	intron:Celsr1
12	21rev	CAGACAGGGGACCGTGGCGCTGG	CACACAGAGGAACATGGCGCTGG	..*....*...*.*......	4	0.103415	0.206044	chr3	153201932	153201954	-	intergenic:St6galnac5-St6galnac3
13	21rev	CAGACAGGGGACCGTGGCGCTGG	AAGACAGGGGACCATGGAGATGG	*............*...*.*	4	0.0203682	0.201923	chr18	80691169	80691191	+	intron:Nfatc1
14	21rev	CAGACAGGGGACCGTGGCGCTGG	CAGACAGGGGGCCAAGGCACGGG	..........*..**...*.	4	0.00952882	0.201598	chr2	34656248	34656270	-	intergenic:Gm13414-Gapvd1
15	21rev	CAGACAGGGGACCGTGGCGCTGG	CAGACAGGAGGCTGTGGCTCTGG	........*.*.*.....*.	4	0.0591441	0.195	chr7	80884940	80884962	+	intergenic:Zscan2-Wdr73
16	21rev	CAGACAGGGGACCGTGGCGCTGG	CAAACAGGGTACTGTGGCCCAGG	..*......*..*.....*.	4	0.175279	0.191218	chr5	33242386	33242408	-	intergenic:Spon2-Ctbp1
17	21rev	CAGACAGGGGACCGTGGCGCTGG	CAGGGAGGGGACTGTGGCTCAGG	...**.......*.....*.	4	0.193016	0.175	chr4	119486134	119486156	-	intron:Rimkla
18	21rev	CAGACAGGGGACCGTGGCGCTGG	CAGAGAGGAGACTGTGGTGCTGG	....*...*...*....*..	4	0.069665	0.173571	chr10	79688334	79688356	-	exon:Cdc34
19	21rev	CAGACAGGGGACCGTGGCGCTGG	GATACAGGGGACCATGGCGATGG	*.*..........*.....*	4	0.102465	0.171196	chr14	30853030	30853052	-	intron:Tmem110
20	21rev	CAGACAGGGGACCGTGGCGCTGG	CAGACAGGCAAGCATGGCGCTGG	........**.*.*......	4	0.0538325	0.167521	chr17	64568350	64568372	-	intergenic:AU016765-Man2a1
21	21rev	CAGACAGGGGACCGTGGCGCTGG	CATACAGGCAACCGTGGTGCTGG	..*.....**.......*..	4	0.172189	0.161538	chr15	64430900	64430922	+	intergenic:Asap1-Adcy8
22	21rev	CAGACAGGGGACCGTGGCGCTGG	CAGAGAGCAGACCGTGGCTCAGG	....*..**.........*.	4	0.289307	0.158242	chr4	142341909	142341931	+	intron:Gm13052
23	21rev	CAGACAGGGGACCGTGGCGCTGG	TGGACAGGGGACCCTGGCCCTGG	**...........*....*.	4	0.0785004	0.153695	chr1	74312191	74312213	-	intergenic:Tmbim1-Pnkd
24	21rev	CAGACAGGGGACCGTGGCGCTGG	CAGGCAGGGGACAGAAGCGCAGG	...*........*.**....	4	0.0268152	0.13917	chr13	70145650	70145672	+	intergenic:Gm6132-Gm26018
25	21rev	CAGACAGGGGACCGTGGCGCTGG	TAGTCCGGGGAGCGTGGCGCGGG	*..*.*.....*........	4	0.425869	0.128558	chr3	88554081	88554103	+	intron:Ubqln4
26	21rev	CAGACAGGGGACCGTGGCGCTGG	CACACAGGAGACTGTGGCACAGG	..*.....*...*.....*.	4	0.116282	0.123626	chr9	119037279	119037301	+	intron:Ctdspl
27	21rev	CAGACAGGGGACCGTGGCGCTGG	GAGAGAGGGCACCGTGGAGCTGG	*...*....*.......*..	4	0.285817	0.117993	chr2	170014683	170014705	+	intergenic:AY702102-A630075F10Rik
28	21rev	CAGACAGGGGACCGTGGCGCTGG	CAGACAGGGCATCATGGCTCTGG	.........*.*.*....*.	4	0.0304283	0.107692	chr1	180513072	180513094	+	intergenic:6330403A02Rik-Parp1
29	21rev	CAGACAGGGGACCGTGGCGCTGG	CAGACAGGCCACTGTGGCACAGG	........**..*.....*.	4	0.0981472	0.107692	chr2	19345534	19345556	-	intron:4930447M23Rik
30	21rev	CAGACAGGGGACCGTGGCGCTGG	CAGGCAGGTGAGCGTGGCACTGG	...*....*..*......*.	4	0.14993	0.10582	chr14	45297827	45297849	-	intron:Ero1l
31	21rev	CAGACAGGGGACCGTGGCGCTGG	CCGAGAGGGGACAGAGGCGCGGG	.*..*.......*.*.....	4	0.155902	0.104974	chr5	138994674	138994696	+	intron:Pdgfa
32	21rev	CAGACAGGGGACCGTGGCGCTGG	CAAACACGAGACCGTGGCGTTGG	..*...*.*..........*	4	0.271673	0.099442	chr2	150725325	150725347	-	intergenic:Gm14136-Gm26681/Entpd6
33	21rev	CAGACAGGGGACCGTGGCGCTGG	CATAGAGGGGAGCGTGGTGCAGG	..*.*......*.....*..	4	0.150546	0.0857143	chr14	29898677	29898699	+	intergenic:Cacna2d3-Selk
34	21rev	CAGACAGGGGACCGTGGCGCTGG	CAGACAGGGGACTCTGGAGAGGG	............**...*.*	4	0.00643285	0.0807692	chr6	54321608	54321630	+	intergenic:9130019P16Rik-Prr15
35	21rev	CAGACAGGGGACCGTGGCGCTGG	CAGACAGAGGAGCTTGGCTCTGG	.......*...*.*....*.	4	0.0330383	0.0790123	chr12	114048734	114048756	-	intergenic:Ighv11-2-Ighv14-3
36	21rev	CAGACAGGGGACCGTGGCGCTGG	CAGACAGAGGAGCTTGGCTCTGG	.......*...*.*....*.	4	0.0330383	0.0790123	chr12	113982371	113982393	-	intergenic:Ighv11-1-Ighv14-2
37	21rev	CAGACAGGGGACCGTGGCGCTGG	CTGACGAGGGACGGTGGCGCTGG	.*...**.....*.......	4	0.228793	0.0708383	chr11	115604593	115604615	-	intergenic:Gga3/Mrps7-Mrps7
38	21rev	CAGACAGGGGACCGTGGCGCTGG	CATCCAGGTGACCATGGCGCTGG	..**....*....*......	4	0.128428	0.0705882	chr1	79808694	79808716	-	intron:Serpine2
39	21rev	CAGACAGGGGACCGTGGCGCTGG	CAGGCATGGGACCTTGGCACGGG	...*..*......*....*.	4	0.0507563	0.0680272	chr2	131269968	131269990	+	intron:Pank2
40	21rev	CAGACAGGGGACCGTGGCGCTGG	CACACTGGGGACAGTGGTGCGGG	..*..*......*....*..	4	0.0716427	0.0679266	chr2	52016482	52016504	-	intergenic:Nmi-Tnfaip6
41	21rev	CAGACAGGGGACCGTGGCGCTGG	CAGACACGGGACACAGGCGCTGG	......*.....***.....	4	0.0144068	0.0656087	chr11	82826117	82826139	+	intron:Rffl
42	21rev	CAGACAGGGGACCGTGGCGCTGG	CAGACAGGGGATCTTGGTTCTGG	...........*.*...**.	4	0.00617778	0.0615385	chr16	24045991	24046013	-	intergenic:Bcl6-1110054M08Rik
43	21rev	CAGACAGGGGACCGTGGCGCTGG	CAGGGAGGGGACCGTGGAGTAGG	...**............*.*	4	0.129409	0.0605769	chr3	121190977	121190999	+	intergenic:Gm5710-Tmem56
44	21rev	CAGACAGGGGACCGTGGCGCTGG	CAGGCAGGGGAGTGTGGCGTTGG	...*.......**......*	4	0.125714	0.0583333	chr1	87684096	87684118	+	intron:Inpp5d
45	21rev	CAGACAGGGGACCGTGGCGCTGG	CAGATAGGTGACCGTGTCTCTGG	....*...*.......*.*.	4	0.111383	0.0565657	chr10	127133204	127133226	+	intergenic:Os9-Gm23664
46	21rev	CAGACAGGGGACCGTGGCGCTGG	CTGACAGGGGCCCTTGGCACTGG	.*........*..*....*.	4	0.0412441	0.0554113	chr2	162977649	162977671	+	intergenic:L3mbtl1-Gm11453
47	21rev	CAGACAGGGGACCGTGGCGCTGG	CAGAAAGGGGACCTAGGAGCTGG	....*........**..*..	4	0.0117648	0.0475034	chr7	123777349	123777371	-	intergenic:Zkscan2-Gm23788
48	21rev	CAGACAGGGGACCGTGGCGCTGG	CAGGCAAGGGATGGTGGCGCTGG	...*..*....**.......	4	0.18606	0.0458916	chr5	150053774	150053796	-	intron:Rxfp2
49	21rev	CAGACAGGGGACCGTGGCGCTGG	CAGACAGTGGAAGGTGGCTCTGG	.......*...**.....*.	4	0.0858108	0.0405844	chr1	172388823	172388845	-	intergenic:Pigm-Slamf9
50	21rev	CAGACAGGGGACCGTGGCGCTGG	CAGCCAGGGCAGCGTGGTGCTGG	...*.....*.*.....*..	4	0.133502	0.0403361	chr3	121242286	121242308	-	intron:Tmem56
51	21rev	CAGACAGGGGACCGTGGCGCTGG	CAGGCTGGGGGCGGTGGCGCGGG	...*.*....*.*.......	4	0.185915	0.0395698	chr7	120504462	120504484	-	intron:Abca16
52	21rev	CAGACAGGGGACCGTGGCGCTGG	CACACAGGGGACTGTAGGGCTGG	..*.........*..*.*..	4	0.0203678	0.0358974	chr7	81289920	81289942	-	intron:Pde8a
53	21rev	CAGACAGGGGACCGTGGCGCTGG	CAGCCAGAGGACCATGGGGCTGG	...*...*.....*...*..	4	0.0438984	0.0352941	chr17	11746909	11746931	-	intron:Park2
54	21rev	CAGACAGGGGACCGTGGCGCTGG	CAGACGGTGGACCGAGGGGCAGG	.....*.*......*..*..	4	0.0477697	0.0344612	chr8	70797094	70797116	+	intergenic:Mast3-mmu-mir-7240
55	21rev	CAGACAGGGGACCGTGGCGCTGG	CACTCAGGGGTCCGTGGCCCAGG	..**......*.......*.	4	0.272931	0.0337593	chr3	89967721	89967743	-	intergenic:Atp8b2-Gm24046
56	21rev	CAGACAGGGGACCGTGGCGCTGG	GAGACATGGGAGCGTGGGGCTGG	*.....*....*.....*..	4	0.104283	0.0309179	chr11	56064987	56065009	+	intergenic:Nmur2-Gm12239
57	21rev	CAGACAGGGGACCGTGGCGCTGG	CAGGCAGGGGACAGTGCAGCTGG	...*........*...**..	4	0.0438969	0.030456	chr12	98447759	98447781	+	intron:Kcnk10
58	21rev	CAGACAGGGGACCGTGGCGCTGG	CATACAGGGGACAGTGCTGCAGG	..*.........*...**..	4	0.0455908	0.0290886	chr2	153935467	153935489	+	intergenic:Bpifb3-Bpifb4
59	21rev	CAGACAGGGGACCGTGGCGCTGG	CAGACGGGGGACCTCGGAGCTGG	.....*.......**..*..	4	0.00711769	0.027972	chr11	56013749	56013771	-	intron:Gm12239
60	21rev	CAGACAGGGGACCGTGGCGCTGG	GAGGTAGAGGACCGTGGCGCTGA	*..**..*............	4	0.272989	0.0252182	chr5	52519816	52519838	+	intergenic:Ccdc149-Lgi2
61	21rev	CAGACAGGGGACCGTGGCGCTGG	CAGAGAGGGGAACCTGGGGCAGG	....*......*.*...*..	4	0.021598	0.0244898	chr15	80097597	80097619	-	intron:Syngr1
62	21rev	CAGACAGGGGACCGTGGCGCTGG	CAGACAGGGAACCAAGGCGGAGG	.........*...**....*	4	0.0219418	0.023839	chr4	128187250	128187272	+	intergenic:4930465A12Rik-Csmd2
63	21rev	CAGACAGGGGACCGTGGCGCTGG	CAGGCAGGGGCCAGTGCCGCAGG	...*......*.*...*...	4	0.1243	0.0226244	chr13	22008432	22008454	+	exon:Prss16
64	21rev	CAGACAGGGGACCGTGGCGCTGG	CAGACAGAGGACGGTGCCTCCGG	.......*....*...*.*.	4	0.0671487	0.0213904	chr17	8473368	8473390	+	intergenic:T-Pde10a
65	21rev	CAGACAGGGGACCGTGGCGCTGG	CAGACAGGGGAGAGTGAGGCTGG	...........**...**..	4	0.0196113	0.0212726	chr3	122114132	122114154	+	intron:Abca4
66	21rev	CAGACAGGGGACCGTGGCGCTGG	CAGACAGGGTACCGGAGCGAAGG	.........*....**...*	4	0.0253288	0.0203125	chr8	93461151	93461173	-	intergenic:Ces1h-Ces5a
67	21rev	CAGACAGGGGACCGTGGCGCTGG	GAGACAGCGGACTGGGGCGCGGG	*......*....*.*.....	4	0.155902	0.0196656	chr1	135056412	135056434	+	intron:Lgr6
68	21rev	CAGACAGGGGACCGTGGCGCTGG	CAGGAAGGGGACAGTGGGGCAGG	...**.......*....*..	4	0.114018	0.018315	chr2	26458781	26458803	+	exon:0610009E02Rik/Notch1/Gm13568
69	21rev	CAGACAGGGGACCGTGGCGCTGG	CAGACAGGGGACCGAGGGCACGG	..............*..***	4	0.00900388	0.0173019	chrX	134751040	134751062	+	exon:Armcx6
70	21rev	CAGACAGGGGACCGTGGCGCTGG	CAGAAAGGGGACTGTGGCAGTGG	....*.......*.....**	4	0.0804878	0.0168067	chr7	36442587	36442609	+	intergenic:Gm25247-Tshz3
71	21rev	CAGACAGGGGACCGTGGCGCTGG	CACACAGGGGATGGTGGAGCAGG	..*........**....*..	4	0.0582615	0.0152067	chr2	181725783	181725805	-	intergenic:Gm14489-Myt1
72	21rev	CAGACAGGGGACCGTGGCGCTGG	CTGGCAGGGGGCCGGGGCGCTGG	.*.*......*...*.....	4	0.223581	0.0147727	chr10	83410352	83410374	+	intergenic:D10Wsu102e-Aldh1l2
73	21rev	CAGACAGGGGACCGTGGCGCTGG	CAGAGAGGGGACATTGCCGCTGG	....*.......**..*...	4	0.0333706	0.0144796	chr8	125587416	125587438	+	intergenic:Sipa1l2-Map10
74	21rev	CAGACAGGGGACCGTGGCGCTGG	GAGACTGGGGACAGGGGCGCAGG	*....*......*.*.....	4	0.0943208	0.0125418	chr19	45234761	45234783	-	intron:Lbx1
75	21rev	CAGACAGGGGACCGTGGCGCTGG	CAGACAGGGGGCTGGGGAGCTGG	..........*.*.*..*..	4	0.0153996	0.01225	chr4	142323567	142323589	+	intron:Gm13052
76	21rev	CAGACAGGGGACCGTGGCGCTGG	CAGGCAGGCGACCGGGGTGCGGG	...*....*.....*..*..	4	0.0482435	0.0108173	chr14	77156308	77156330	-	intergenic:Ccdc122-Enox1
77	21rev	CAGACAGGGGACCGTGGCGCTGG	CAGACAGGGCACAGTGGGGAAGG	.........*..*....*.*	4	0.0416791	0.0102564	chr15	11152625	11152647	-	intron:Adamts12
78	21rev	CAGACAGGGGACCGTGGCGCTGG	CAGACAGTGGACAGTGGCTGAGG	.......*....*.....**	4	0.0764124	0.00942685	chr2	162220335	162220357	+	intron:Ptprt
79	21rev	CAGACAGGGGACCGTGGCGCTGG	CAGGCAGGGGGCAGTGGCGGGGG	...*......*.*......*	4	0.141812	0.00919118	chr6	134043472	134043494	-	intron:Etv6
80	21rev	CAGACAGGGGACCGTGGCGCTGG	CAGGCAGGGGACCCTGGAGGAGG	...*.........*...*.*	4	0.0192819	0.00848416	chr15	86927683	86927705	+	intergenic:Tbc1d22a-Gm23416
81	21rev	CAGACAGGGGACCGTGGCGCTGG	CTGGTAGGGCACCGTGGCGCGGA	.*.**....*..........	4	0.251422	0.00803489	chr6	8510047	8510069	-	exon:Glcci1/A430035B10Rik
82	21rev	CAGACAGGGGACCGTGGCGCTGG	CAGAGAGGGGACAGTGGAGGTGG	....*.......*....*.*	4	0.0500813	0.00730943	chr4	133951261	133951283	+	intergenic:Rps6ka1-Hmgn2
83	21rev	CAGACAGGGGACCGTGGCGCTGG	CTGGCAGGGGTCCGGGGCGCTGG	.*.*......*...*.....	4	0.223581	0.00699301	chr10	83426099	83426121	+	intergenic:D10Wsu102e-Aldh1l2
84	21rev	CAGACAGGGGACCGTGGCGCTGG	CAGACAGGGGACTGGGTAGCAGG	............*.*.**..	4	0.010213	0.00471154	chr7	141109852	141109874	-	intron:Ano9
85	21rev	CAGACAGGGGACCGTGGCGCTGG	CACACAGGGGACAGTGGAGGAGG	..*.........*....*.*	4	0.0493801	0.00468553	chr2	150575564	150575586	+	intron:Cst7
86	21rev	CAGACAGGGGACCGTGGCGCTGG	GAGACAGGGGGCCGTGGGGGTGG	*.........*......*.*	4	0.0758683	0.00465473	chr13	107089238	107089260	+	intergenic:3830408C21Rik-Apoo-ps
87	21rev	CAGACAGGGGACCGTGGCGCTGG	CAGACAGGGGTCAGTGTGGCTGG	..........*.*...**..	4	0.0221225	0.00394477	chrX	6418538	6418560	-	intron:Shroom4
88	21rev	CAGACAGGGGACCGTGGCGCTGG	CAGACTGGGGGCCGTGGGGGTGG	.....*....*......*.*	4	0.0412522	0.00364146	chr2	32157947	32157969	+	intergenic:Prrc2b-AL808027.1
89	21rev	CAGACAGGGGACCGTGGCGCTGG	CAGACAGGGGACAGCGTGGCTGG	............*.*.**..	4	0.010213	0.0034965	chr17	63536071	63536093	-	intergenic:Fbxl17-A930002H24Rik
90	21rev	CAGACAGGGGACCGTGGCGCTGG	CACACAGGGGAGAGGGGCGCTGG	..*........**.*.....	4	0.07563	0.00328731	chr4	127234037	127234059	+	intron:Dlgap3
91	21rev	CAGACAGGGGACCGTGGCGCTGG	GAGACAGGGGACCCTGGGGGGGG	*............*...*.*	4	0.0203682	0.00306905	chr6	83037300	83037322	-	intron:Loxl3
92	21rev	CAGACAGGGGACCGTGGCGCTGG	CAGACAGGGGAAGGGGGAGCAGG	...........**.*..*..	4	0.0136515	0.00262238	chr10	55639909	55639931	+	intergenic:Gm25602-Tbc1d32
93	21rev	CAGACAGGGGACCGTGGCGCTGG	CACACAGGGGACTGTGGGGGAGG	..*.........*....*.*	4	0.0493801	0.00211161	chr7	37832331	37832353	-	intergenic:Gm22302-Uri1
94	21rev	CAGACAGGGGACCGTGGCGCTGG	CAGACAGGTGACAGTGGGGGAGG	........*...*....*.*	4	0.0276503	0.00160885	chr7	137977109	137977131	+	intergenic:Glrx3-Gm25798
95	21rev	CAGACAGGGGACCGTGGCGCTGG	CAGACAGGGGACCAGGGAGGAGG	.............**..*.*	4	0.00445479	0.00118778	chr16	60916173	60916195	-	intergenic:AC131701.1-Gm17065
96	21rev	CAGACAGGGGACCGTGGCGCTGG	CAGACAGGGGACAGGGGCAGGGG	............*.*...**	4	0.0185955	0.000808016	chr10	93007662	93007684	+	intron:Gm872
97	21rev	CAGACAGGGGACCGTGGCGCTGG	CAGACAGGGGCCCGGGGCTGGGG	..........*...*...**	4	0.0279531	0.000784314	chr13	63703981	63704003	+	intergenic:Ptch1-Ercc6l2
98	21rev	CAGACAGGGGACCGTGGCGCTGG	CAGAAAGGGGACGGGGGGGCGGG	....*.......*.*..*..	4	0.0305568	0.000519481	chr18	76832158	76832180	+	intergenic:Smad2-Skor2
99	21rev	CAGACAGGGGACCGTGGCGCTGG	CAGGCAGGGCACAGTTGCGCAGG	...*.....*..*..*....	4	0.0921522	0	chr7	128379692	128379714	-	intron:Rgs10
100	21rev	CAGACAGGGGACCGTGGCGCTGG	CAGACAGGGGACAGGTGCCCAGG	............*.**..*.	4	0.00767007	0	chr5	37658674	37658696	+	intron:Stk32b
101	21rev	CAGACAGGGGACCGTGGCGCTGG	CAGCCTGGGGACCGACGCGCTGG	...*.*........**....	4	0.0419204	0	chr6	39118039	39118061	-	exon:Parp12
102	21rev	CAGACAGGGGACCGTGGCGCTGG	GAGACAGGGGACTGAGGCGCAGG	*...........*.*.....	3	0.3268	0.370023	chr5	105105403	105105425	+	intron:Gbp9
103	21rev	CAGACAGGGGACCGTGGCGCTGG	GAGACAGGGGACTGAGGCGCAGG	*...........*.*.....	3	0.3268	0.370023	chr5	105235678	105235700	+	intron:Gbp10
104	21rev	CAGACAGGGGACCGTGGCGCTGG	CTGACAGGGGACAGTAGCGCAGG	.*..........*..*....	3	0.209737	0.27972	chr9	99954948	99954970	+	intergenic:Gm23594-Il20rb
105	21rev	CAGACAGGGGACCGTGGCGCTGG	CAGATAGGGGACAGTGGCTCAGG	....*.......*.....*.	3	0.384112	0.16317	chr7	58654788	58654810	-	intergenic:Gm26288-Atp10a
106	21rev	CAGACAGGGGACCGTGGCGCTGG	CAGACAGGGGAGCGTGGAGAAGG	...........*.....*.*	3	0.107459	0.119658	chr11	57786132	57786154	+	exon:Galnt10
107	21rev	CAGACAGGGGACCGTGGCGCTGG	CAGACAGGGGAGAGTGGTGCGGG	...........**....*..	3	0.0949216	0.10989	chr10	28581823	28581845	-	intron:Ptprk
108	21rev	CAGACAGGGGACCGTGGCGCTGG	CAGACAGGGGACCCTGGCTTAGG	.............*....**	3	0.0497813	0.0857143	chr17	14224976	14224998	+	intergenic:Dact2-Smoc2
109	21rev	CAGACAGGGGACCGTGGCGCTGG	CAGACAGGGGACCCTGGCTTAGG	.............*....**	3	0.0497813	0.0857143	chr17	14226107	14226129	+	intergenic:Dact2-Smoc2
110	21rev	CAGACAGGGGACCGTGGCGCTGG	CAGACAGGGGACAGTGGAGTGGG	............*....*.*	3	0.0804519	0.0621302	chr9	47402373	47402395	-	intergenic:Gm4791-Gm22286
111	21rev	CAGACAGGGGACCGTGGCGCTGG	CAGGCAGGGGAGCGTGGCGCTGA	...*.......*........	2	0.741905	0.0192901	chr12	70907957	70907979	+	intergenic:Frmd6-Gm24857
